# Supplementary material for: Respiratory Function in Friedreich’s Ataxia
Source: MDPI journal article supplement (doi:10.3390/children9091319), 2022-08-29
Supplement: s1 [file s1]

**Table S1.** One-way ANOVA spirometry and degree of correlation with severity of scoliosis.

| Variable                 | Correlation | <i>p</i> -Value |
|--------------------------|-------------|-----------------|
| FVC sitting              | 3.84        | 0.033           |
| FVC sitting % predicted  | 3.69        | 0.037           |
| FVC supine               | 4.47        | 0.020           |
| FVC supine % predicted   | 3.83        | 0.033           |
| fev1 sitting             | 2.31        | 0.118           |
| fev1 sitting % predicted | 2.31        | 0.118           |
| fev1 sup                 | 3.23        | 0.054           |
| fev1 sup % predicted     | 2.56        | 0.095           |
| Tif sitting              | 0.95        | 0.397           |
| Tif sup                  | 0.39        | 0.681           |
| Pef                      | 0.56        | 0.579           |
| Pcf                      | 3.05        | 0.063           |
| Pef pcf                  | 1.46        | 0.250           |
| mip                      | 0.32        | 0.732           |
| mep                      | 0.77        | 0.471           |

**Figure S1.** (A) Sitting - supine FVC values expressed as + or - % for each subject; (B) % difference expressed as mean, median, SD and range (two outliers, subjects 22 and 27 are marked separately as individual points).

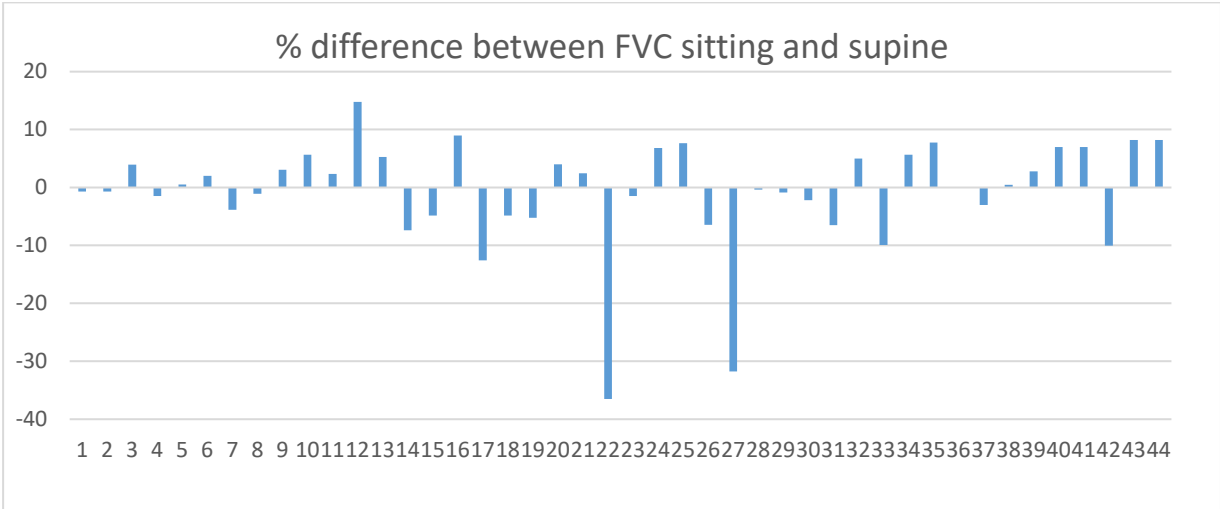

(a)

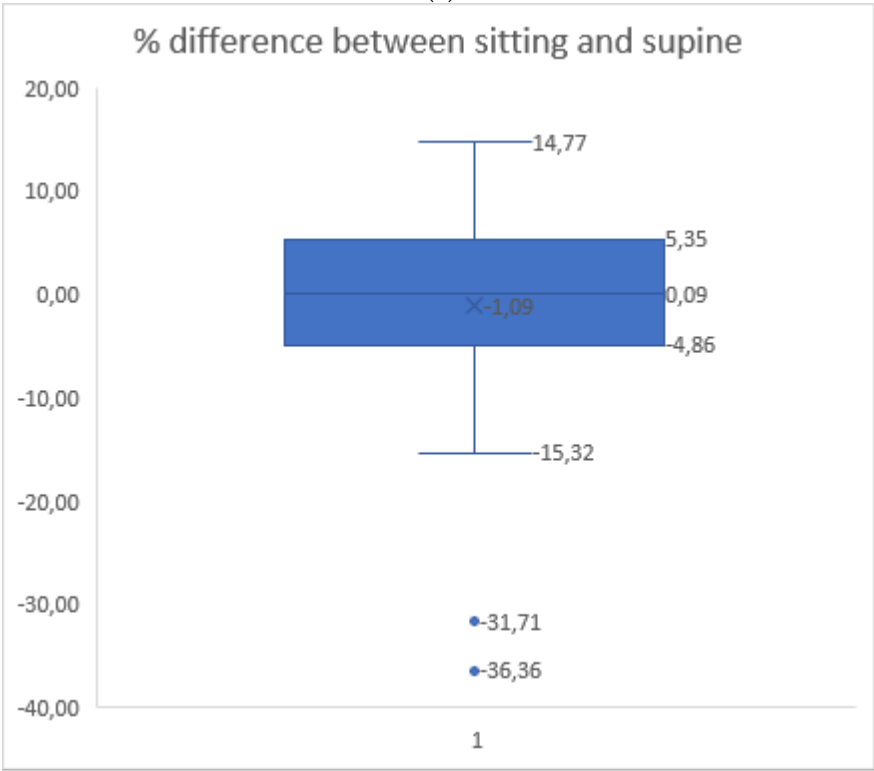

(b)
